## Research Article

# The association of *FOXP3* gene polymorphisms with cancer susceptibility: a comprehensive systemic review and meta-analysis

Yan Chen<sup>1,2</sup>, Xiaoxue Qi<sup>2</sup>, Ce Bian<sup>1</sup>, Chen Ling<sup>1</sup>, Tao Yi<sup>1</sup>,  Xiyuan Mu<sup>1</sup> and Xia Zhao<sup>1</sup><sup>1</sup>Department of Gynecology and Obstetrics, Key Laboratory of Obstetric and Gynecologic and Pediatric Diseases and Birth Defects of Ministry of Education, West China Second University Hospital, Sichuan University, Chengdu 610041, P.R. China; <sup>2</sup>Department of Gynecology and Obstetrics, Chengdu First People's Hospital, Chengdu 610041, P.R. China

Correspondence: Xia Zhao (xia-zhao@126.com)

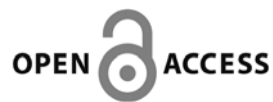

The role of forkhead box P3 (FOXP3) protein in tumorigenesis has long been controversial and existing data on the association between *FOXP3* gene polymorphisms and cancer susceptibility were inconsistent. Here, we conducted a meta-analysis to better clarify the relationship. A comprehensive search of studies published from July 2008 to June 2018 was conducted. The statistical analyses of the pooled odds ratios (ORs) and the corresponding 95% confidence intervals (95% CIs) were performed using the Revman 5.2 software. A total of 12 articles with 19 case-control studies and 10389 participants were included. Three *FOXP3* polymorphisms and six cancer types were evaluated. While no significant results were observed in overall and breast cancer groups for rs3761548 (A/C) polymorphisms, the pooled data showed an elevated risk of cancer in variant AA genotypes and A allele for Chinese population (AA vs. AC+CC: OR = 1.61, 95% CI = 1.09, 2.39; AA vs. CC: OR = 1.74, 95% CI = 1.05, 2.89; A vs. C: OR = 1.34, 95% CI = 1.00, 1.78). Neither the overall group analyses nor the subgroup analyses stratified by cancer type and ethnicity proposed any significant association of rs2280883 (C/T) and rs3761549 (T/C) polymorphisms with cancer susceptibility. This meta-analysis suggested that *FOXP3* rs3761548 (A/C) polymorphisms were associated with increased cancer risk in Chinese population while rs2280883 (C/T) and rs3761549 (T/C) polymorphisms were not. More large-sample researches with diverse ethnicities and cancer types are needed to draw a concrete conclusion.

## Introduction

Tumor microenvironment (TME) plays an important role in cancer suppression and promotion [1]. As a crucial component of TME, regulatory T cells (Tregs) are responsible for down-regulating chronic inflammation, hindering autoimmune reactions, and maintaining peripheral immunological tolerance [2–4]. Recently published data demonstrated that Tregs-mediated immunosuppression was a pivotal tumor immune evasion mechanism, and might contribute to the failure of tumor immunotherapy [5,6]. A notable characteristic of Tregs is their expression of the transcription factor forkhead box P3 (FOXP3). The FOXP3 protein, which is encoded from *FOXP3* gene located on the X chromosome at Xp11.23, belongs to the forkhead/winged-helix transcription factor family and functions as a transcriptional repressor to down-regulate cytokine production of Tregs [7]. Several studies reported that FOXP3+ Tregs could infiltrate tumors at higher ratios than other T cells. The accumulation of FOXP3+ Tregs in tumors and local lymph nodes could inhibit immune responses and thus result in tumorigenesis with a less favorable prognosis [8–10]. While Tregs are the major cell type expressing FOXP3 under physiological conditions, it has recently been found that FOXP3 was also expressed in a variety of cancers, such as ovarian, hepatocellular, pancreatic, and thyroid [11–14]. However, the role of FOXP3 as a tumor suppressor has also been

Received: 09 October 2018  
Revised: 11 February 2019  
Accepted: 18 February 2019Accepted Manuscript Online:  
19 February 2019  
Version of Record published:  
19 March 2019

documented. Zuo et al. [15] found that *FOXP3* could be expressed in breast epithelial cells but was down-regulated in mammary cancer tissues. Li et al. [16] reported several mutations of this gene in prostate cancer patients and explored the tumor suppressor relationship between the *FOXP3* and the Hippo pathways. This reminded us the complex role of *FOXP3* and raised the possibility that mutations of *FOXP3* gene might cause immune dysregulation and further cancer development.

Genetic variants, mainly composed of single-nucleotide polymorphisms (SNPs), have been proved to cause alterations in protein function in multiple diseases [17]. Several *FOXP3* SNPs have been unveiled and their role in cancer susceptibility was explored. For example, Fazelzadeh Haghghi et al. [18] enrolled 312 Iranian participants and reported that T allele in rs3761549 (T/C) was correlated with susceptibility to lung cancer. You et al. [19] studied rs3761548 (A/C) polymorphisms in Chinese population and found the frequency of the A allele was significantly lower in endometrial cancer women than that in healthy controls. Another widely studied polymorphism was rs2280883 (C/T). Zheng et al. [20] recruited 1049 breast cancer patients from multiple centers in China but failed to report a significant correlation between allele C mutation and breast cancer risk.

To solve the controversy, a meta-analysis in 2014 was published and suggested that *FOXP3* rs3761549 (T/C) and rs3761548 (A/C) polymorphisms were not associated with the risk of breast cancer, but with the risk of lung cancer and hepatocellular cancer [21]. Unfortunately, it only included five articles with two types of polymorphisms. Since new case–control studies and more polymorphisms were published in recent years, we conducted a comprehensive search of relevant studies with the aim to better clarify the association between *FOXP3* polymorphisms and cancer susceptibility.

## Materials and methods

### Literature search

A comprehensive search of studies published from July 2008 to June 2018 was conducted in online databases of PubMed, Medline (Ovid), Embase, CNKI, Weipu, and Wanfang. The following search query was used: ‘*FOXP3*’, ‘Forkhead box protein’, ‘polymorphism’, ‘mutation’, ‘variant’, ‘cancer’, and ‘malignancy’. The search was updated twice a week until 30 June 2018. Language restrictions were not set and references of identified articles were also assessed for inclusion.

### Inclusion and exclusion criteria

An eligible study was included if it was consistent with the following criteria: (i) studied *FOXP3* polymorphisms in cancer risk; (ii) analyzed the polymorphisms that appeared in at least two independent articles for potential meta-analysis; (iii) provided sufficient data for extraction and calculation; and (iv) case–control studies based on human patients. When duplicated data appeared in different publications, only the most recent one was included. Meanwhile, studies that did not fulfill the above criteria were excluded.

### Data extraction and quality assessment

Potential studies were independently reviewed by two investigators (Y.C. and X.Q.). The following information was extracted from both cases and control groups: first author, year of publication, ethnicity, cancer type, SNPs, control type, genotyping method, adjusted parameters, and genotype distributions. Any discrepancies were resolved through a panel discussion until a consensus was reached.

The Newcastle–Ottawa Scale (NOS) was used to investigate the methodological quality of included studies. Three aspects of selection, comparability, and exposure were carefully evaluated. A score of 0–9 was determined and studies of moderate or high quality were included (score above 5). ([http://www.ohri.ca/programs/clinical\\_epidemiology/oxford.asp](http://www.ohri.ca/programs/clinical_epidemiology/oxford.asp)) [22].

### Statistical analysis

To estimate the strength of the association between different *FOXP3* polymorphisms and cancer susceptibility, pooled odds ratios (ORs) and corresponding 95% confidence intervals (C95% Is) were calculated. Since SNPs were considered as binary variables of wild (W) and variant (V) alleles, five comparative models were used as follows: recessive model (VV vs. WW), dominant model (VV+VW vs. WW), heterozygous model (VW vs. VV+WW), co-dominant model (VV+VW vs. WW), and allelic model (V vs. W) [23]. Heterogeneity in each study was evaluated based on Higgins  $I^2$  test. The random-effects model was applied when  $I^2 > 50\%$ , indicating the presence of heterogeneity. Otherwise, if the  $I^2$  was less than 50%, the fixed-effects model was used [24]. The Z-test was then performed to determine the significance of the pooled ORs where  $P < 0.05$  was illustrated as statistically significant. Eventually, the presence

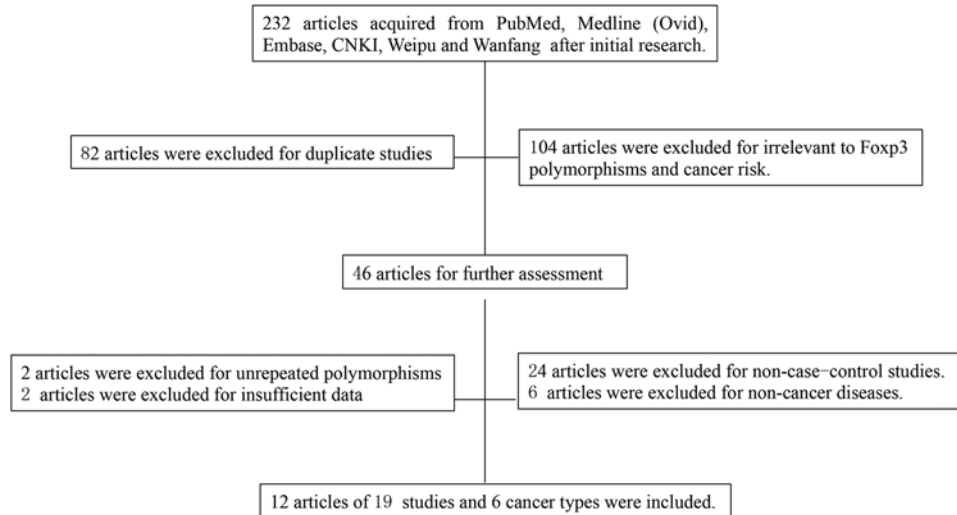

**Figure 1. Flow chart of publication selection**

of publication bias was evaluated by visually inspecting the funnel plots. When asymmetry was suspected, Egger's test was performed and  $P_{Egger}$  above 0.05 indicating the absence of bias. All statistical analyses were performed using Revman 5.2 software (Cochrane Collaboration, Copenhagen, Denmark) except the Egger's test, which was conducted using STATA 14.0 (StataCorp LP, College Station, TX, U.S.A.).

## Results

### Search results

As shown in Figure 1, a total of 232 publications were retrieved after the initial research. In our further screening, 82 articles were excluded for duplicity while 104 articles were removed since they were irrelevant to *FOXP3* polymorphisms or cancer risk according to titles and abstracts. Amongst the remaining 46 articles for full-text evaluation, 24 articles were biochemical studies, reviews, or meta-analysis; 6 articles studied non-cancer diseases such as autoimmune diseases; 2 articles analyzed several *FOXP3* polymorphisms that were not studied in other independent researches, resulting in the impossibility of data pooling; 2 articles failed to offer sufficient data for calculation. Therefore, we enrolled 12 articles in this meta-analysis [18–20,25–33].

### Characteristics of included studies

The 12 enrolled articles consisted of 19 case–control studies with three *FOXP3* polymorphisms (rs2280883 in four studies, rs3761548 in ten studies, and rs3761549 in five studies) and six cancer types (breast cancer in ten studies, colorectal cancer in one study, endometrial cancer in one study, hepatocellular in two studies, lung cancer in three studies, and thyroid cancer in two studies). Ethnicities included Brazilian, Chinese, Indian, Iranian, and Israeli. The control sources were population-based in two studies and hospital-based in eight studies (two studies failed to mention details on control type). Different genotyping methods were utilized including PCR-PAGE, PCR-restriction fragment length polymorphism (PCR-RFLP), and MS. The NOS showed that four articles were of high quality (NOS score of 8 or 9) and eight were of moderate quality (NOS score of 6 or 7). Adjusted parameters that might affect the cancer susceptibility were also listed (Table 1). All studies reported the numbers of corresponding genotypes for both case and control groups as to recessive, heterogeneous, and wild genotypes (Table 2).

### Quantitative analysis

Pooled ORs and corresponding 95% CIs were shown in Table 3. Ten studies including 9565 participants were evaluated in rs3761548 (A/C) polymorphisms. For the overall group analysis, only one comparative model indicated an increased cancer risk while the remaining four failed to present any statistical significance (AA vs. AC+CC: OR = 1.38, 95% CI = 1.03, 1.86; AA+AC vs. CC: OR = 1.11, 95% CI = 0.87, 1.42; AC vs. AA+CC: OR = 1.02, 95% CI = 0.86, 1.23; AA vs. CC: OR = 1.39, 95% CI = 0.94, 2.05; A vs. C: OR = 1.16, 95% CI = 0.95, 1.40; Figure 2A). Thus it was impossible to draw a definite conclusion. Since six out of ten studies were focussed on breast cancer and Chinese

**Table 1** Characteristics of included studies

| Authors                        | Year | Ethnicity | Cancer type    | SNPs                                               | Control type | Genotyping method | Adjusted parameters                                                         | Study quality (NOS) |
|--------------------------------|------|-----------|----------------|----------------------------------------------------|--------------|-------------------|-----------------------------------------------------------------------------|---------------------|
| Chen et al. [25]               | 2013 | Chinese   | Hepatocellular | rs2280883(C/T)<br>rs3761549(T/C)                   | Hospital     | MS                | Age                                                                         | 8                   |
| Chen et al. [26]               | 2014 | Chinese   | Colorectal     | rs3761548(A/C)                                     | Hospital     | PCR-PAGE          | Age, gender, smoking, alcohol drinking, family history of cancer            | 8                   |
| Fazelzadeh Haghghi et al. [18] | 2015 | Iranian   | Lung           | rs2280883(C/T)<br>rs3761549(T/C)                   | Unknown      | PCR-RFLP          | Age, gender, family history of cancer                                       | 6                   |
| He et al. [27]                 | 2013 | Chinese   | Lung           | rs3761548(A/C)                                     | Hospital     | PCR-PAGE          | Age, gender                                                                 | 7                   |
| Banin Hirata et al. [28]       | 2017 | Brazilian | Breast         | rs3761548(A/C)                                     | Unknown      | PCR-RFLP          | Age                                                                         | 7                   |
| Jahan et al. [29]              | 2014 | Indian    | Breast         | rs3761548(A/C)<br>rs3761549(T/C)                   | Hospital     | PCR-RFLP          | Age, menopausal status, family history of cancer                            | 7                   |
| Jiang et al. [30]              | 2017 | Chinese   | Thyroid        | rs2280883(C/T)<br>rs3761548(A/C)                   | Hospital     | PCR-RFLP          | Age, gender                                                                 | 8                   |
| Lopes et al. [31]              | 2014 | Brazilian | Breast         | rs3761548(A/C)                                     | Population   | PCR-RFLP          | Age                                                                         | 8                   |
| Raskin et al. [32]             | 2009 | Israeli   | Breast         | rs3761548(A/C)                                     | Population   | PCR-RFLP          | Age                                                                         | 7                   |
| Tian et al. [33]               | 2018 | Chinese   | Breast         | rs3761548(A/C)<br>rs3761549(T/C)                   | Hospital     | MS                | Age, menopausal status, procreative times                                   | 7                   |
| You et al. [19]                | 2018 | Chinese   | Endometrial    | rs3761548(A/C)                                     | Hospital     | PCR-RFLP          | Age, BMI, family history of cancer, menopausal status, history of pregnancy | 7                   |
| Zheng et al. [20]              | 2013 | Chinese   | Breast         | rs2280883(C/T)<br>rs3761548(A/C)<br>rs3761549(T/C) | Hospital     | MS                | Age, BMI, family history of cancer, age at menarche                         | 7                   |

Abbreviation: BMI, body mass index.

population respectively, corresponding subgroup analyses were conducted. The results of 7096 participants showed no significant correlation between rs3761548 (A/C) polymorphisms and breast cancer susceptibility. However, an elevated risk in Chinese population was observed by using random-effects models in the enrolled 2779 cases and 2970 controls (AA vs. AC+CC: OR = 1.61, 95% CI = 1.09, 2.39; AA vs. CC: OR = 1.74, 95% CI = 1.05, 2.89; A vs. C: OR = 1.34, 95% CI = 1.00, 1.78; Figure 2B–D). It could be concluded that rs3761548 (A/C) polymorphism was associated with increased cancer risk in Chinese population.

The meta-analysis of the other two polymorphisms failed to show significant association between variant genotypes (or alleles) and cancer susceptibility in corresponding effect models. Briefly, for rs2280883 (C/T) polymorphisms, 3620 participants including 1821 cases and 1799 controls were analyzed. None of the five comparative models displayed any relationship between rs2280883 (C/T) polymorphisms and cancer risk, neither in the overall group analysis (CC vs. CT+TT: OR = 1.18, 95% CI = 0.87, 1.59; CC+CT vs. TT: OR = 0.79, 95% CI = 0.53, 1.18; CT vs. CC+TT: OR = 0.69, 95% CI = 0.36, 1.30; CC vs. TT: OR = 1.12, 95% CI = 0.83, 1.52; C vs. T: OR = 0.88, 95% CI = 0.68, 1.14) nor in the stratified Chinese group analysis (CC vs. CT+TT: OR = 1.23, 95% CI = 0.91, 1.66; CC+CT vs. TT: OR = 0.79, 95% CI = 0.50, 1.24; CT vs. CC+TT: OR = 0.62, 95% CI = 0.29, 1.29; CC vs. TT: OR = 1.15, 95% CI = 0.85, 1.57; C vs. T: OR = 0.90, 95% CI = 0.68, 1.20). Amongst the five studies that focussed on rs3761549 (T/C) polymorphisms, three reported increased cancer risk for mutated genotypes while two reported insignificant results. By pooling the 4424 participants together, no significant correlation was found between T/C mutation and cancer risk. The results of subgroup analysis on breast cancer and Chinese population were consistent with the overall group analysis.

### Publication bias

The publication bias was visually examined on the funnel plots generated by Revman 5.2 software. No obvious asymmetry could be observed (Figure 3). We further performed Egger's tests in the three analyses that proposed significant

**Table 2** Numbers of genotypes in cases and controls

| SNPs              | Authors                  | Year                 | Ethnicity | Cancer type    | Case number    | Control number | Case |     |     | Control |     |     |     |
|-------------------|--------------------------|----------------------|-----------|----------------|----------------|----------------|------|-----|-----|---------|-----|-----|-----|
|                   |                          |                      |           |                |                |                | VV   | VW  | WW  | VV      | VW  | WW  |     |
| rs2280883 (C/T)   | Chen et al. [25]         | 2013                 | Chinese   | Hepatocellular | 392            | 372            | 54   | 26  | 312 | 41      | 64  | 267 |     |
|                   | Fazelzadeh               | 2015                 | Iranian   | Lung           | 30             | 30             | 1    | 14  | 15  | 4       | 13  | 13  |     |
|                   | Haghighi et al. [18]     |                      |           |                |                |                |      |     |     |         |     |     |     |
|                   | Jiang et al. [30]        | 2017                 | Chinese   | Thyroid        | 350            | 306            | 13   | 49  | 288 | 10      | 69  | 227 |     |
| rs3761548 (A/C)   | Zheng et al. [20]        | 2013                 | Chinese   | Breast         | 1049           | 1091           | 35   | 365 | 649 | 31      | 349 | 711 |     |
|                   | Chen et al. [26]         | 2014                 | Chinese   | Colorectal     | 360            | 400            | 57   | 123 | 180 | 29      | 114 | 257 |     |
|                   | He et al. [27]           | 2013                 | Chinese   | Lung           | 192            | 259            | 37   | 80  | 75  | 18      | 80  | 161 |     |
|                   | Banin Hirata et al. [28] | 2017                 | Brazilian | Breast         | 117            | 300            | 14   | 48  | 55  | 41      | 132 | 127 |     |
|                   | Jahan et al. [29]        | 2014                 | Indian    | Breast         | 202            | 130            | 27   | 160 | 15  | 20      | 106 | 4   |     |
|                   | Jiang et al. [30]        | 2017                 | Chinese   | Thyroid        | 350            | 306            | 19   | 109 | 222 | 11      | 73  | 222 |     |
|                   | Lopes et al. [31]        | 2014                 | Brazilian | Breast         | 50             | 115            | 6    | 17  | 27  | 4       | 66  | 45  |     |
|                   | Raskin et al. [32]       | 2009                 | Israeli   | Breast         | 1444           | 1458           | 320  | 722 | 402 | 303     | 763 | 392 |     |
|                   | Tian et al. [33]         | 2018                 | Chinese   | Breast         | 559            | 581            | 24   | 198 | 337 | 20      | 173 | 388 |     |
|                   | You et al. [19]          | 2018                 | Chinese   | Endometrial    | 269            | 333            | 13   | 83  | 173 | 21      | 134 | 178 |     |
|                   | Zheng et al. [20]        | 2013                 | Chinese   | Breast         | 1049           | 1091           | 38   | 338 | 673 | 30      | 342 | 719 |     |
|                   | rs3761549 (T/C)          | Chen et al. [25]     | 2013      | Chinese        | Hepatocellular | 388            | 362  | 59  | 28  | 301     | 41  | 88  | 233 |
|                   |                          | Fazelzadeh           | 2015      | Iranian        | Lung           | 30             | 30   | 1   | 4   | 25      | 0   | 3   | 27  |
|                   |                          | Haghighi et al. [18] |           |                |                |                |      |     |     |         |     |     |     |
| Jahan et al. [29] |                          | 2014                 | Indian    | Breast         | 202            | 130            | 0    | 198 | 4   | 0       | 128 | 2   |     |
| Tian et al. [33]  | 2018                     | Chinese              | Breast    | 560            | 582            | 18             | 157  | 385 | 23  | 187     | 372 |     |     |
| Zheng et al. [20] | 2013                     | Chinese              | Breast    | 1049           | 1091           | 32             | 283  | 734 | 34  | 290     | 767 |     |     |

association between rs3761548 (A/C) polymorphisms and cancer susceptibility in Chinese population. The results demonstrated no significant publication bias ( $P > 0.05$ , data not shown).

## Discussion

Since alteration of the human immune system can contribute to the development of human cancer, FOXP3 has attracted attention in recent decades as one of the main transcription factors for Tregs, an important participant of immune evasion and surveillance in TME [34–36]. While imbalance of FOXP3+Tregs has been widely reported in autoimmune diseases such as allergic rhinitis and Graves' disease, the role of FOXP3 in tumorigenesis has long been controversial [37,38]. FOXP3 is able to repress oncogenes while activating additional tumor suppressor genes. Evidences of this dual role include the down-regulation of MYC and HER2 by FOXP3+ Tregs, and the up-regulation of FOXP3 protein in both Tregs and tumor cells in patients with lung cancer and hepatocellular carcinoma [39–42]. Polymorphisms of the FOXP3 gene may change FOXP3 protein quantitatively or functionally, thus contributing to predisposition and progression of cancer. To date, several polymorphisms of FOXP3 have been found including rs2280883, rs3761548, rs3761549, rs2294020, rs2294021, rs5906761, rs5902434 etc [19,20,32]. Their roles in cancer susceptibility remain undetermined due to sample size, ethnicity, and other confounding factors. Here, we conducted a thorough meta-analysis with the aim to address the inconsistencies of existing publications and to draw a more concrete conclusion.

We enrolled 19 case–control studies with 10389 participants in this meta-analysis. Three types of FOXP3 polymorphisms and six types of cancers were analyzed. The results showed that rs3761548 (A/C) were correlated with cancer susceptibility in Chinese population. The variant AA genotypes and A allele imposed a significant higher cancer risk compared with their counterparts (AA vs. AC+CC: OR = 1.61, 95% CI = 1.09, 2.39; AA vs. CC: OR = 1.74, 95% CI = 1.05, 2.89; A vs. C: OR = 1.34, 95% CI = 1.00, 1.78). Notably, while the breast subgroup analysis failed to present any significance, only one comparative model in the overall group suggested that AA genotypes proposed a 1.38-fold increased risk compared with AC plus CC genotypes (OR = 1.38, 95% CI = 1.03, 1.86). The reason behind this was due to the Lopes et al.'s [31] study of triple-negative breast cancer (TNBC) in Brazil which suggested that AC



**Table 3 Summary of different comparative results of FOXP3 polymorphisms on cancer susceptibility**

| SNPs            | Genotypes and alleles | Overall and subgroup | Participant number | OR [95% CI]       | Z value           | P-value | I <sup>2</sup> (%) | Effect model |        |
|-----------------|-----------------------|----------------------|--------------------|-------------------|-------------------|---------|--------------------|--------------|--------|
| rs2280883 (C/T) | CC vs. CT+TT          | Overall              | 3620               | 1.18 [0.87, 1.59] | 1.08              | 0.28    | 0                  | Fixed        |        |
|                 |                       | Chinese              | 3560               | 1.23 [0.91, 1.66] | 1.33              | 0.18    | 0                  | Fixed        |        |
|                 | CC+CT vs. TT          | Overall              | 3620               | 0.79 [0.53, 1.18] | 1.14              | 0.25    | 80                 | Random       |        |
|                 |                       | Chinese              | 3560               | 0.79 [0.50, 1.24] | 1.01              | 0.31    | 86                 | Random       |        |
|                 | CT vs. CC+TT          | Overall              | 3620               | 0.69 [0.36, 1.30] | 1.16              | 0.25    | 89                 | Random       |        |
|                 |                       | Chinese              | 3560               | 0.62 [0.29, 1.29] | 1.29              | 0.20    | 93                 | Random       |        |
|                 | CC vs. TT             | Overall              | 2671               | 1.12 [0.83, 1.52] | 0.74              | 0.46    | 0                  | Fixed        |        |
|                 |                       | Chinese              | 2638               | 1.15 [0.85, 1.57] | 0.91              | 0.36    | 0                  | Fixed        |        |
|                 | C vs. T               | Overall              | 7240               | 0.88 [0.68, 1.14] | 0.96              | 0.34    | 68                 | Random       |        |
|                 |                       | Chinese              | 7120               | 0.90 [0.68, 1.20] | 0.72              | 0.47    | 76                 | Random       |        |
|                 | rs3761548 (A/C)       | AA vs. AC+CC         | Overall            | 9565              | 1.38 [1.03, 1.86] | 2.15    | 0.03               | 67           | Random |
|                 |                       |                      | Breast             | 7096              | 1.10 [0.95, 1.28] | 1.30    | 0.19               | 8            | Fixed  |
| Chinese         |                       |                      | 5749               | 1.61 [1.09, 2.39] | 2.37              | 0.02    | 63                 | Random       |        |
| AA+AC vs. CC    |                       | Overall              | 9565               | 1.11 [0.87, 1.42] | 0.83              | 0.41    | 84                 | Random       |        |
|                 |                       | Breast               | 7096               | 1.02 [0.92, 1.13] | 0.44              | 0.66    | 60                 | Random       |        |
|                 |                       | Chinese              | 5749               | 1.35 [0.98, 1.86] | 1.84              | 0.07    | 87                 | Random       |        |
| AC vs. AA+CC    |                       | Overall              | 9400               | 1.02 [0.86, 1.23] | 0.27              | 0.79    | 72                 | Random       |        |
|                 |                       | Breast               | 7096               | 0.95 [0.78, 1.16] | 0.51              | 0.61    | 64                 | Random       |        |
|                 |                       | Chinese              | 5749               | 1.17 [0.94, 1.45] | 1.40              | 0.01    | 71                 | Random       |        |
| AA vs. CC       |                       | Overall              | 5704               | 1.39 [0.94, 2.05] | 1.65              | 0.10    | 78                 | Random       |        |
|                 |                       | Breast               | 3031               | 1.06 [0.89, 1.26] | 0.69              | 0.49    | 28                 | Fixed        |        |
|                 |                       | Chinese              | 3,902              | 1.74 [1.05, 2.89] | 2.16              | 0.03    | 76                 | Random       |        |
| A vs. C         |                       | Overall              | 19130              | 1.16 [0.95, 1.40] | 1.63              | 0.10    | 88                 | Random       |        |
|                 |                       | Breast               | 13862              | 1.04 [0.96, 1.12] | 0.95              | 0.34    | 26                 | Fixed        |        |
|                 |                       | Chinese              | 11498              | 1.34 [1.00, 1.78] | 1.97              | 0.05    | 90                 | Random       |        |
| rs3761549 (T/C) |                       | TT vs. TC+CC         | Overall            | 4424              | 1.12 [0.84, 1.48] | 0.77    | 0.44               | 0            | Fixed  |
|                 |                       |                      | Breast             | 3614              | 0.91 [0.62, 1.34] | 0.48    | 0.63               | 0            | Fixed  |
|                 |                       |                      | Chinese            | 4032              | 1.11 [0.83, 1.47] | 0.70    | 0.49               | 17           | Fixed  |
|                 | TT+TC vs. CC          | Overall              | 4424               | 0.80 [0.58, 1.10] | 1.37              | 0.17    | 70                 | Random       |        |
|                 |                       | Breast               | 3614               | 0.93 [0.80, 1.08] | 0.93              | 0.35    | 11                 | Fixed        |        |
|                 |                       | Chinese              | 4032               | 0.77 [0.54, 1.10] | 1.45              | 0.15    | 84                 | Random       |        |
|                 | TC vs. TT+CC          | Overall              | 4424               | 0.67 [0.38, 1.18] | 1.38              | 0.17    | 88                 | Random       |        |
|                 |                       | Breast               | 3614               | 0.94 [0.81, 1.10] | 0.77              | 0.44    | 0                  | Fixed        |        |
|                 |                       | Chinese              | 4032               | 0.61 [0.32, 1.17] | 1.50              | 0.13    | 94                 | Random       |        |
|                 | TT vs. CC             | Overall              | 3058               | 1.00 [0.75, 1.33] | 0.03              | 0.97    | 0                  | Fixed        |        |
|                 |                       | Breast               | 2371               | 0.89 [0.60, 1.31] | 0.59              | 0.56    | 0                  | Fixed        |        |
|                 |                       | Chinese              | 3005               | 0.98 [0.74, 1.31] | 0.11              | 0.91    | 0                  | Fixed        |        |
|                 | T vs. C               | Overall              | 8848               | 0.91 [0.82, 1.02] | 1.68              | 0.09    | 34                 | Fixed        |        |
|                 |                       | Breast               | 7228               | 0.95 [0.84, 1.07] | 0.90              | 0.37    | 6                  | Fixed        |        |
|                 |                       | Chinese              | 8064               | 0.88 [0.74, 1.04] | 1.48              | 0.14    | 54                 | Random       |        |

heterozygous genotype was a protective factor while AA was a risky one. If we excluded it from the meta-analysis, no significant results could be drawn (AA vs. AC+CC: OR = 1.33, 95% CI = 0.99, 1.78). Interestingly, in the article published by You et al. [19], both the variant A allele and mutated genotypes (AA plus AC) in rs3761548 showed a statistically significant protective effect on endometrial cancer, which is contrary to the rest of included studies [19]. If we excluded it from the meta-analysis, an elevated risk was again concluded for A/C mutation in overall cancer risk (AA vs. AC+CC: OR = 1.47, 95% CI = 1.07, 2.00). The intriguing results reminded us the controversial role of *FOXP3* in cancer immunity, especially in different cancer types. As an X-linked gene, the mutated *FOXP3* in females depends on X-chromosome inactivation [43,44]. Whether this rs3761548 position was related to gender-specific cancers or hormone-related cancers such as breast and endometrial cancers remained to be solved. Another relevant point lies in the location of mutated *FOXP3* protein in different tumor cells. According to Lopes et al. [31], most TNBC patients had cytoplasmic expression of *FOXP3* protein and only some had concomitant perinuclear and/or nuclear expression.

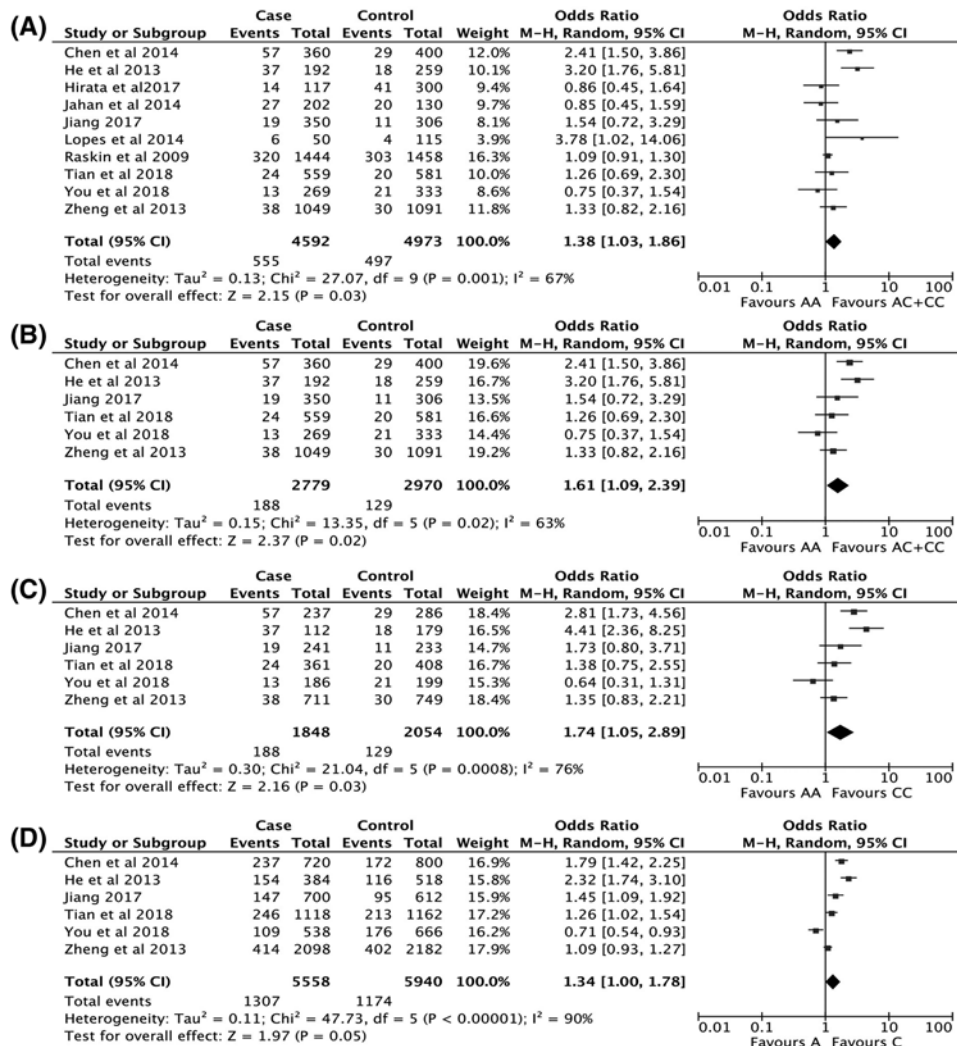

**Figure 2. Representative forest plots of rs3761548 (A/C) polymorphisms and cancer susceptibility**  
 (A) AA vs. AC+CC in overall group analysis. (B) AA vs. AC+CC in Chinese group analysis. (C) AA vs. CC in Chinese group analysis.  
 (D) A vs. C in Chinese group analysis. Abbreviations: df, degree of freedom; M-H, Mantel and Haenszel.

The re-localization of FOXP3 protein due to polymorphisms like rs3761548 in certain types of cancer might affect transcription functions and thus cytokine production of Tregs [45].

The results of rs3761549 (T/C) polymorphisms in cancer susceptibility were consistent with the previous meta-analysis [21]. With 4424 participants enrolled, the meta-analysis revealed no significant relationship between rs3761549 (T/C) polymorphisms and cancer risk. However, whether T/C mutations were correlated with increased risk of hepatocellular cancer like previously described remained questionable due to non-repeated researches and limited sample sizes. Specifically, our subgroup analysis stratified by Chinese population indicated a lack of significant association, which was never reported before. Like rs3761548 (A/C), rs3761549 (T/C) polymorphisms were also located in the promoter region of the FOXP3 gene, which is considered to cause mRNA instability thus affecting FOXP3 production and activity [46,47]. The specific reason why the two types of polymorphisms acted differently in case-control studies is not clear, which is a promising subject for future studies. We also explored the role of rs2280883 (C/T) polymorphisms in cancer risk. The meta-analysis failed to draw a significant conclusion, neither in general sample nor in different subtypes. The less aggressive role of rs2280883 (C/T) polymorphisms might be due to the location, which was in intron 9 very near a conserved transcription region of FOXP3 gene. This could cause splicing downstream, resulting in a less functional gene. Further researches are needed to consolidate the exact mechanism [30,48].

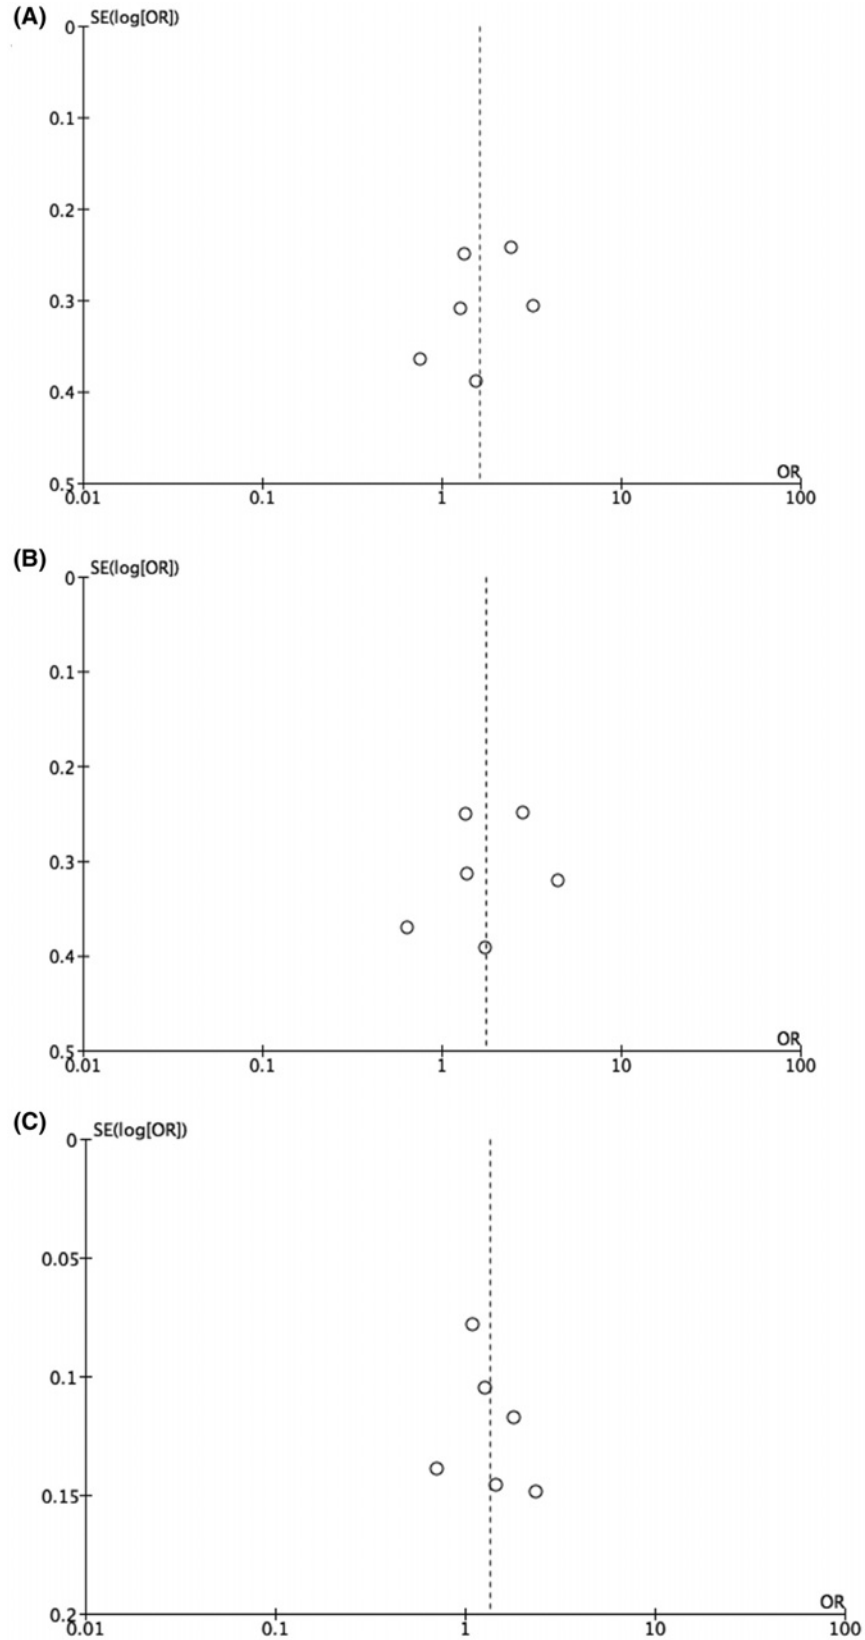

**Figure 3. Representative funnel plots of publication bias of rs3761548 (A/C) polymorphisms and cancer susceptibility (A) AA vs. AC+CC in Chinese group analysis. (B) AA vs. CC in Chinese group analysis. (C) A vs. C in Chinese group analysis. Abbreviation: SE, standard error.**



Despite our efforts to include all the existing publications, some disadvantages of the present meta-analysis should be notified. First, insufficient published studies were enrolled in this meta-analysis. Although the number of participants was so far the largest, more individual studies were still required to determine a precise conclusion, especially for rs2280883 (C/T) polymorphisms. Second, amongst the 19 studies, only six types of cancer were included. It is known that Tregs play a dual role in tumorigenesis. Whether the tumor promotion effect takes place or the contrary is largely due to the biological characteristics of primary cancer [49]. Thus, caution must be paid when explaining the results to other cancers such as the sex-related and hormone-related cancers. Third, the populations of included studies were Chinese, Iranian, Brazilian, Israeli, and Indian, and many other ethnicities like blacks and Caucasians were ignored. This might affect the overall group analysis since we noticed a different result when Chinese population was stratified for rs3761548 (A/C) polymorphisms. Fourth, our evaluation was based on unadjusted results. Risk factors like body mass index, smoking habit, and menstruation status are also known to be important to tumorigenesis in several types of cancer [50,51]. These confounding factors might cause distorted results. Therefore, studies on more types of cancer are needed to help draw a concrete conclusion.

Taken together, based on current articles in databases, our meta-analysis suggested that *FOXP3* rs3761548 (A/C) polymorphisms were associated with cancer risk in Chinese population while no significant correlation was confirmed in rs2280883 (C/T) and rs3761549 (T/C) polymorphisms. To the best of our knowledge, the present study was the most comprehensive one to explore the relationship between *FOXP3* polymorphisms and cancer risk. It is also the first to pool the results of rs2280883 (C/T) polymorphisms and conduct subgroup analysis stratified by ethnicity. Considering the limitations mentioned above, more large-sample researches with diverse ethnicities and cancer types are needed to help reach a consensus.

## Funding

This work was supported by the Key Technology Research and Development Program of Sichuan Province, P.R. China [grant number 2017SZ0002] and the Science and Technology Project of the Health Planning Committee of Sichuan Province, P.R. China [grant number 18PJ061].

## Competing interests

The authors declare that there are no competing interests associated with the manuscript.

## Author contribution

Y.C. and X.Z. contributed to study concept and design. Y.C. and X.Q. contributed to literature search and data extraction. X.M. and C.L. contributed to data analysis and the study quality evaluation. Y.C. and T.Y. contributed to the methodology. T.Y. and X.Z. contributed to the supervision of all the study processes. All the authors contributed to writing the manuscript. All authors approved the final version of the manuscript.

## Abbreviations

95% CI, confidence interval; *FOXP3*, forkhead box P3; NOS, Newcastle–Ottawa Scale; OR, odds ratio; SNP, single-nucleotide polymorphism; TME, tumor microenvironment; TNBC, triple-negative breast cancer; Treg, regulatory T cell.

## References

- Schreiber, R.D., Old, L.J. and Smyth, M.J. (2011) Cancer immunoeediting: integrating immunity's roles in cancer suppression and promotion. *Science* **331**, 1565–1570, <https://doi.org/10.1126/science.1203486>
- Nishikawa, H. and Sakaguchi, S. (2010) Regulatory T cells in tumor immunity. *Int. J. Cancer* **127**, 759–767
- Shevach, E.M. (2002) CD4+ CD25+ suppressor T cells: more questions than answers. *Nat. Rev. Immunol.* **2**, 389–400, <https://doi.org/10.1038/nri821>
- von Boehmer, H. (2005) Mechanisms of suppression by suppressor T cells. *Nat. Immunol.* **6**, 338–344, <https://doi.org/10.1038/ni1180>
- Leffers, N., Gooden, M.J., de Jong, R.A. et al. (2009) Prognostic significance of tumor-infiltrating T-lymphocytes in primary and metastatic lesions of advanced stage ovarian cancer. *Cancer Immunol. Immunother.* **58**, 449–459, <https://doi.org/10.1007/s00262-008-0583-5>
- Sakaguchi, S. (2004) Naturally arising CD4+ regulatory t cells for immunologic self-tolerance and negative control of immune responses. *Annu. Rev. Immunol.* **22**, 531–562, <https://doi.org/10.1146/annurev.immunol.21.120601.141122>
- Hori, S., Nomura, T. and Sakaguchi, S. (2003) Control of regulatory T cell development by the transcription factor Foxp3. *Science* **299**, 1057–1061, <https://doi.org/10.1126/science.1079490>
- Yamagami, W., Susumu, N., Tanaka, H. et al. (2011) Immunofluorescence-detected infiltration of CD4+FOXP3+ regulatory T cells is relevant to the prognosis of patients with endometrial cancer. *Int. J. Gynecol. Cancer* **21**, 1628–1634, <https://doi.org/10.1097/IGC.0b013e31822c271f>
- Fontenot, J.D., Gavin, M.A. and Rudensky, A.Y. (2003) Foxp3 programs the development and function of CD4+CD25+ regulatory T cells. *Nat. Immunol.* **4**, 330–336, <https://doi.org/10.1038/ni904>

- 10 Tang, Q. and Bluestone, J.A. (2008) The Foxp3+ regulatory T cell: a jack of all trades, master of regulation. *Nat. Immunol.* **9**, 239–244, <https://doi.org/10.1038/ni1572>
- 11 Fu, J., Xu, D., Liu, Z. et al. (2007) Increased regulatory T cells correlate with CD8 T-cell impairment and poor survival in hepatocellular carcinoma patients. *Gastroenterology* **132**, 2328–2339, <https://doi.org/10.1053/j.gastro.2007.03.102>
- 12 Ugolini, C., Elisei, R., Proietti, A. et al. (2014) FoxP3 expression in papillary thyroid carcinoma: a possible resistance biomarker to iodine 131 treatment. *Thyroid* **24**, 339–346, <https://doi.org/10.1089/thy.2012.0589>
- 13 Hinz, S., Pagerols-Raluy, L., Oberg, H.H. et al. (2007) Foxp3 expression in pancreatic carcinoma cells as a novel mechanism of immune evasion in cancer. *Cancer Res.* **67**, 8344–8350, <https://doi.org/10.1158/0008-5472.CAN-06-3304>
- 14 Curiel, T.J., Coukos, G., Zou, L. et al. (2004) Specific recruitment of regulatory T cells in ovarian carcinoma fosters immune privilege and predicts reduced survival. *Nat. Med.* **10**, 942–949, <https://doi.org/10.1038/nm1093>
- 15 Zuo, T., Liu, R., Zhang, H. et al. (2007) FOXP3 is a novel transcriptional repressor for the breast cancer oncogene SKP2. *J. Clin. Invest.* **117**, 3765–3773
- 16 Li, W., Wang, L., Kato, H. et al. (2011) Identification of a tumor suppressor relay between the FOXP3 and the Hippo pathways in breast and prostate cancers. *Cancer Res.* **71**, 2162–2171, <https://doi.org/10.1158/0008-5472.CAN-10-3268>
- 17 Min, L., Mu, X., Tong, A. et al. (2018) The association between HOTAIR polymorphisms and cancer susceptibility: an updated systemic review and meta-analysis. *Oncol. Targets Ther.* **11**, 791–800, <https://doi.org/10.2147/OTT.S151454>
- 18 Fazelzadeh Haghghi, M., Ali Ghayumi, M. and Behzadnia, F. (2015) Investigation of FOXP3 genetic variations at positions -2383 C/T and IVS9+459 T/C in southern Iranian patients with lung carcinoma. *Iran. J. Basic Med. Sci.* **18**, 465–471
- 19 You, D., Wang, Y., Zhang, Y. et al. (2018) Association of Foxp3 promoter polymorphisms with susceptibility to endometrial cancer in the Chinese Han women. *Medicine (Baltimore)* **97**, e0582
- 20 Zheng, J., Deng, J., Jiang, L. et al. (2013) Heterozygous genetic variations of FOXP3 in Xp11.23 elevate breast cancer risk in Chinese population via skewed X-chromosome inactivation. *Hum. Mutat.* **34**, 619–628
- 21 Jiang, L.L. and Ruan, L.W. (2014) Association between FOXP3 promoter polymorphisms and cancer risk: a meta-analysis. *Oncol. Lett.* **8**, 2795–2799, <https://doi.org/10.3892/ol.2014.2585>
- 22 Wells, G.A., Shea, B. and O'Connell, D. (2018) The Newcastle-Ottawa scale. [http://www.ohri.ca/programs/clinical\\_epidemiology/oxford.asp](http://www.ohri.ca/programs/clinical_epidemiology/oxford.asp). Accessed June 30, 2018
- 23 Mu, X., Zhao, J., Yuan, X. et al. (2015) Gene polymorphisms of toll-like receptor 9 -1486T/C and 2848G/A in cervical cancer risk. *Int. J. Gynecol. Cancer* **25**, 1173–1178, <https://doi.org/10.1097/IGC.0000000000000494>
- 24 Su, H., Rei, N. and Zhang, L. (2018) Meta-analyses of IL1A polymorphisms and the risk of several autoimmune diseases published in databases. *PLoS ONE* **13**, e0198693, <https://doi.org/10.1371/journal.pone.0198693>
- 25 Chen, Y., Zhang, H., Liao, W. et al. (2013) FOXP3 gene polymorphism is associated with hepatitis B-related hepatocellular carcinoma in China. *J. Exp. Clin. Cancer Res.* **32**, 39, <https://doi.org/10.1186/1756-9966-32-39>
- 26 Chen, L., Yu, Q. and Liu, B. (2014) Association of FoxP3 rs3761548 polymorphism with susceptibility to colorectal cancer in the Chinese population. *Med. Oncol.* **31**, 374, <https://doi.org/10.1007/s12032-014-0374-0>
- 27 He, Y.Q., Bo, Q. and Yong, W. (2013) FoxP3 genetic variants and risk of non-small cell lung cancer in the Chinese Han population. *Gene* **531**, 422–425, <https://doi.org/10.1016/j.gene.2013.08.066>
- 28 Banin Hirata, B.K., Losi Guembarovski, R. and Vitiello, G.A.F. (2017) FOXP3 allelic variants and haplotype structures are associated with aggressive breast cancer subtypes. *Dis. Markers* **2017**, 6359603, <https://doi.org/10.1155/2017/6359603>
- 29 Jahan, P., Ramachander, V.R. and Maruthi, G. (2014) Foxp3 promoter polymorphism (rs3761548) in breast cancer progression: a study from India. *Tumour Biol.* **35**, 3785–3791, <https://doi.org/10.1007/s13277-013-1501-9>
- 30 Jiang, W., Zheng, L., Xu, L. et al. (2017) Association between FOXP3 gene polymorphisms and risk of differentiated thyroid cancer in Chinese Han population. *J. Clin. Lab. Anal.* **31**, <https://doi.org/10.1002/jcla.22104>
- 31 Lopes, L.F., Guembarovski, R.L., Guembarovski, A.L. et al. (2014) FOXP3 transcription factor: a candidate marker for susceptibility and prognosis in triple negative breast cancer. *Biomed. Res. Int.* **2014**, 341654
- 32 Raskin, L., Rennett, G. and Gruber, S.B. (2009) FOXP3 germline polymorphisms are not associated with risk of breast cancer. *Cancer Genet. Cytogenet.* **190**, 40–42, <https://doi.org/10.1016/j.cancergencyto.2008.12.005>
- 33 Tian, T., Wang, M., Zheng, Y. et al. (2018) Association of two FOXP3 polymorphisms with breast cancer susceptibility in Chinese Han women. *Cancer Manag. Res.* **10**, 867–872, <https://doi.org/10.2147/CMAR.S158433>
- 34 Ohara, M., Yamaguchi, Y. and Matsuura, K. (2009) Possible involvement of regulatory T cells in tumor onset and progression in primary breast cancer. *Cancer Immunol. Immunother.* **58**, 441–447, <https://doi.org/10.1007/s00262-008-0570-x>
- 35 Dunn, G.P., Old, L.J. and Schreiber, R.D. (2004) The three Es of cancer immunoeediting. *Annu. Rev. Immunol.* **22**, 329–360, <https://doi.org/10.1146/annurev.immunol.22.012703.104803>
- 36 Schubert, L.A., Jeffery, E. and Zhang, Y. (2001) Scurfin (FOXP3) acts as a repressor of transcription and regulates T cell activation. *J. Biol. Chem.* **276**, 37672–37679, <https://doi.org/10.1074/jbc.M104521200>
- 37 Shehjar, F., Afroze, D. and Misgar, R.A. (2018) Association of FoxP3 promoter polymorphisms with the risk of Graves' disease in ethnic Kashmiri population. *Gene* **672**, 88–92, <https://doi.org/10.1016/j.gene.2018.06.023>
- 38 Coria-Ramirez, E., Vargas-Camano, M.E., Guido-Bayardo, R.L. et al. (2013) Levels of CD4+ and FOXP3+ lymphocytes in patients with allergic rhinitis. *Rev. Alerg. Mex.* **60**, 5–10
- 39 Zuo, T., Wang, L., Morrison, C. et al. (2007) FOXP3 is an X-linked breast cancer suppressor gene and an important repressor of the HER-2/ErbB2 oncogene. *Cell* **129**, 1275–1286, <https://doi.org/10.1016/j.cell.2007.04.034>

- 40 Zeng, H. and Chi, H. (2014) mTOR signaling and transcriptional regulation in T lymphocytes. *Transcription* **5**, e28263, <https://doi.org/10.4161/trns.28263>
- 41 Liu, S., Foulkes, W.D., Leung, S. et al. (2014) Prognostic significance of FOXP3+ tumor-infiltrating lymphocytes in breast cancer depends on estrogen receptor and human epidermal growth factor receptor-2 expression status and concurrent cytotoxic T-cell infiltration. *Breast Cancer Res.* **16**, 432, <https://doi.org/10.1186/s13058-014-0432-8>
- 42 Ladoire, S., Arnould, L., Mignot, G. et al. (2011) Presence of Foxp3 expression in tumor cells predicts better survival in HER2-overexpressing breast cancer patients treated with neoadjuvant chemotherapy. *Breast Cancer Res. Treat.* **125**, 65–72, <https://doi.org/10.1007/s10549-010-0831-1>
- 43 Kristiansen, M., Knudsen, G.P., Maguire, P. et al. (2005) High incidence of skewed X chromosome inactivation in young patients with familial non-BRCA1/BRCA2 breast cancer. *J. Med. Genet.* **42**, 877–880, <https://doi.org/10.1136/jmg.2005.032433>
- 44 Chang, D., Gao, F., Slavney, A. et al. (2014) Accounting for eXentricities: analysis of the X chromosome in GWAS reveals X-linked genes implicated in autoimmune diseases. *PLoS ONE* **9**, e113684, <https://doi.org/10.1371/journal.pone.0113684>
- 45 Karanikas, V., Speletas, M., Zamanakou, M. et al. (2008) Foxp3 expression in human cancer cells. *J. Transl. Med.* **6**, 19, <https://doi.org/10.1186/1479-5876-6-19>
- 46 Buchynska, L.G., Iurchenko, N.P. and Verko, N.P. (2015) FOXP3 gene promoter methylation in endometrial cancer cells. *Exp. Oncol.* **37**, 246–249
- 47 Conteduca, G., Rossi, A., Megiorni, F. et al. (2014) Single nucleotide polymorphisms in the promoter regions of Foxp3 and ICOSLG genes are associated with Alopecia areata. *Clin. Exp. Med.* **14**, 91–97, <https://doi.org/10.1007/s10238-012-0224-3>
- 48 Oda, J.M., Hirata, B.K. and Guembarovski, R.L. (2013) Genetic polymorphism in FOXP3 gene: imbalance in regulatory T-cell role and development of human diseases. *J. Genet.* **92**, 163–171, <https://doi.org/10.1007/s12041-013-0213-7>
- 49 French, J.D., Weber, Z.J. and Fretwell, D.L. (2010) Tumor-associated lymphocytes and increased FoxP3+ regulatory T cell frequency correlate with more aggressive papillary thyroid cancer. *J. Clin. Endocrinol. Metab.* **95**, 2325–2333, <https://doi.org/10.1210/jc.2009-2564>
- 50 Taghizadeh, N., Boezen, H.M. and Schouten, J.P. (2015) BMI and lifetime changes in BMI and cancer mortality risk. *PLoS ONE* **10**, e0125261, <https://doi.org/10.1371/journal.pone.0125261>
- 51 Kabat, G.C., Kim, M.Y., Luo, J. et al. (2013) Menstrual and reproductive factors and exogenous hormone use and risk of transitional cell bladder cancer in postmenopausal women. *Eur. J. Cancer Prev.* **22**, 409–416, <https://doi.org/10.1097/CEJ.0b013e32835f3ba3>
